# Supplementary material for: Spatial transcriptomics using multiplexed deterministic barcoding in tissue
Source: PubMed Central journal article supplement (PMC10024691; doi:10.1038/s41467-023-37111-w), 2023-03-18
Supplement: 41467_2023_37111_MOESM3_ESM.pdf [file 41467_2023_37111_MOESM3_ESM.pdf]

## **Description of Additional Supplementary Files**

File Name: Supplementary Data 1

Description: Sequences of primers for reverse transcription with respective 5' modifications.

File Name: Supplementary Data 2

Description: Sets of reverse transcription primer barcodes to encode the nine tissue sections. Optimal mixtures were determined using BARCOSEL.

File Name: Supplementary Data 3

Description: Sequences of ligation round 1 oligonucleotides with their respective 5' modifications.

File Name: Supplementary Data 4

Description: Sequences of ligation round 2 oligonucleotides with their respective 5' modifications.

File Name: Supplementary Data 5

Description: Sequences of the bridge oligonucleotides and primers used during xDBiT library preparation.
